# Supplementary material for: Solubility, speciation and local environment of chlorine in zirconolite glass–ceramics for the immobilisation of plutonium residues
Source: Royal Society of Chemistry journal article supplement (doi:10.1039/d0ra04938g), 2020-01-01
Supplement: d0ra04938g1.pdf [file d0ra04938g1.pdf]

**Supplementary Data for:**  
**Zirconolite glass-ceramics for the immobilisation of chlorine**  
**contaminated plutonium residues.**

Stephanie M. Thornber<sup>a</sup>, Lucy M. Mottram<sup>a</sup>, Amber R. Mason<sup>a</sup>, Paul  
Thompson<sup>b,c</sup>, Martin C. Stennett<sup>a</sup>, and Neil C. Hyatt<sup>a,\*</sup>

<sup>a</sup>*Immobilisation Science Laboratory, Department of Materials Science & Engineering, The University of Sheffield, Sir Robert Hadfield Building, Mappin Street, Sheffield S1 3JD, UK*

<sup>b</sup>*XMaS, UK CRG, ESRF, 71 Avenue des Martyrs, 38043 Grenoble, France.*

<sup>c</sup>*Department of Physics, University of Liverpool, Oliver Lodge Laboratory, Liverpool L69 7ZE, UK.*

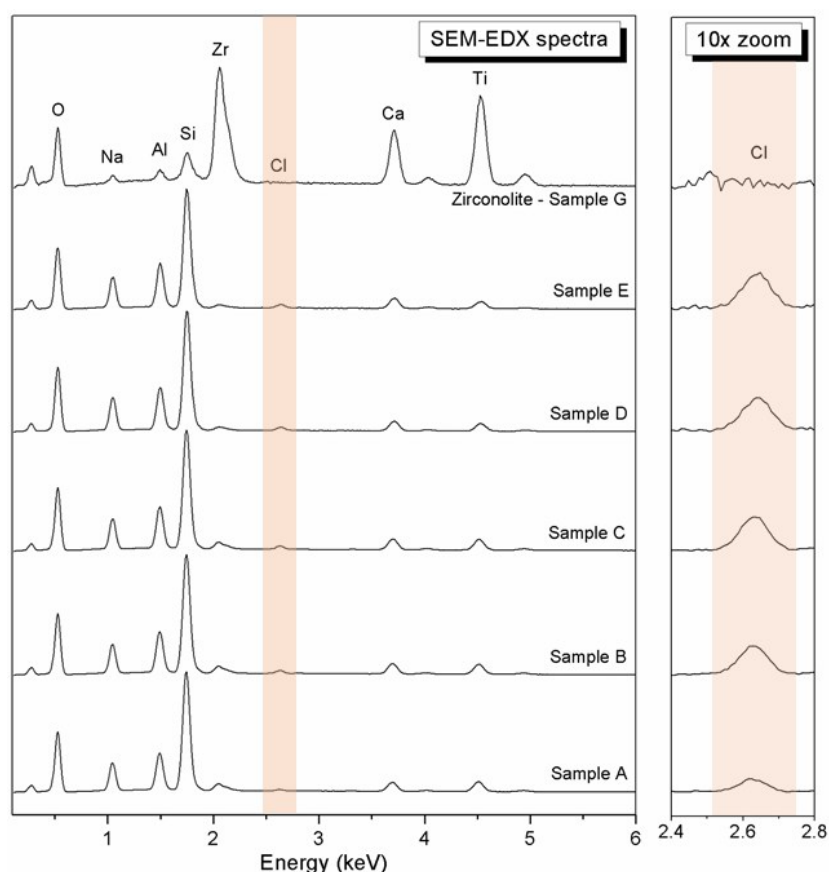

**Figure S1: EDX spectra of the glass phase confirming retention and incorporation of Cl and absence of Cl in zirconolite phase.**

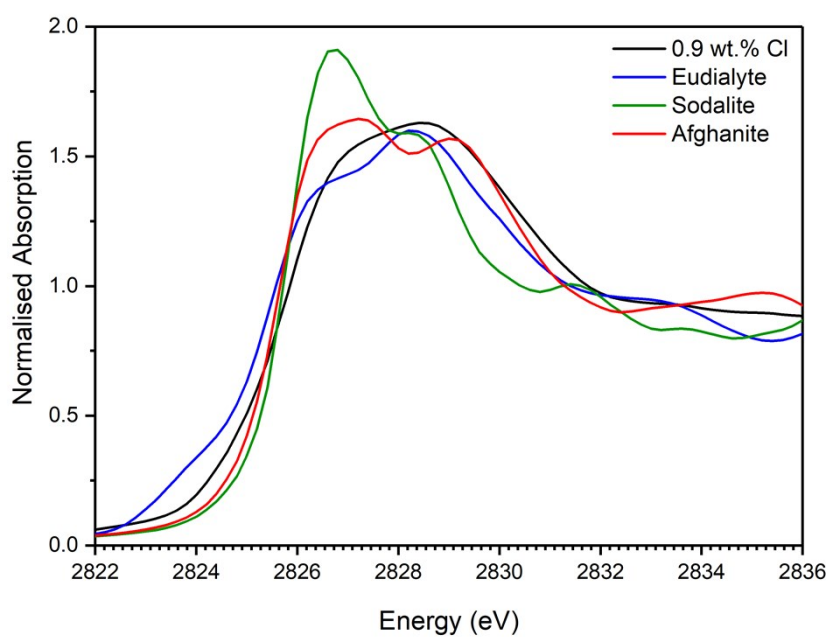

**Figure S2: Comparison of Cl K-edge XANES data for glass-ceramic composition C (0.9 wt. % Cl) compared with the XANES data for aluminosilicate reference compounds eudialyte, sodalite and afghanite.**
